# Supplementary material
Source: PubMed Central journal article supplement (PMC8565501)
Supplement: NIHMS1751126-supplement-Supplementary_material.pdf [file NIHMS1751126-supplement-Supplementary_material.pdf]

Supplemental Material:

Supplemental Figure S1

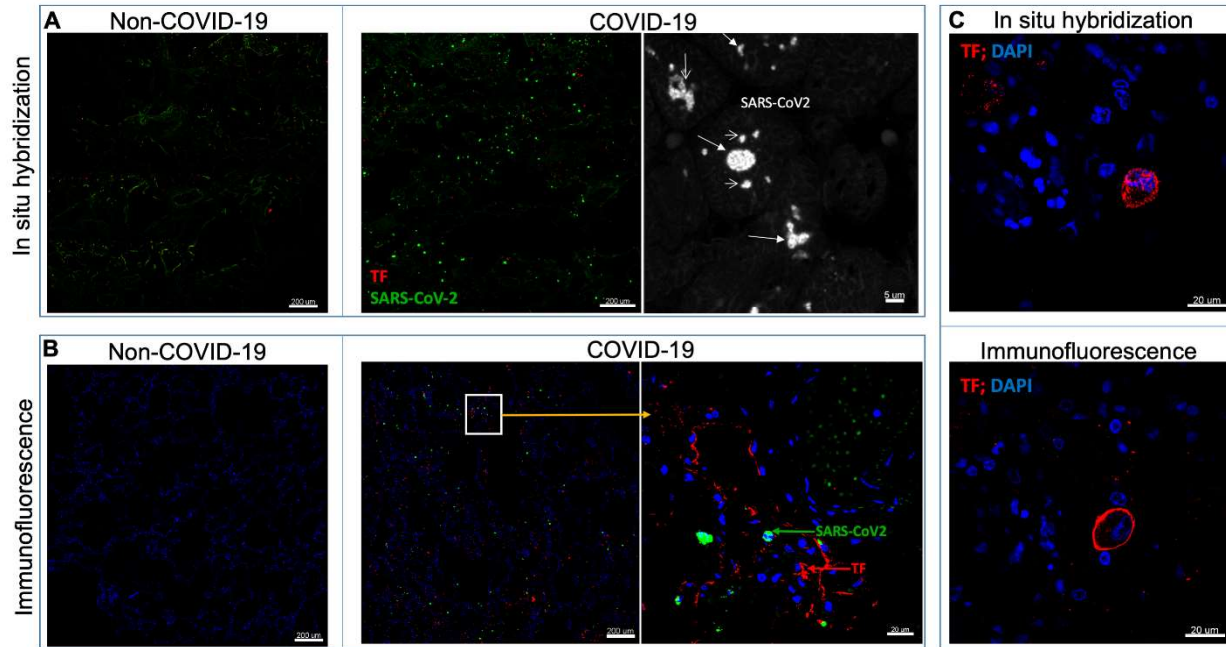

**Supplemental Figure S1:** (A) Dual RNA in situ hybridization detecting SARS-CoV-2 viral RNA (green color dots and high-resolution white pseudo color dots) and TF RNA (red color dots) in non-COVID-19, control and COVID-19-ARDS lungs. No viral RNA was detected in non-COVID-9 control lung. (B) Immunofluorescence staining of SARS-CoV-2 N-protein (green color dots) detect presence of virus and TF (red color) and high-magnification image shows TF expression in cells with nuclei stained with dapi in COVID-19-ARDS. (C) TF RNA probe in situ hybridization detecting TF RNA (mostly in nuclei, upper panel), and immunofluorescence staining with anti-TF antibody (cell surface, bottom panel) in COVID-19-ARDS lung.

Supplemental Figure S2

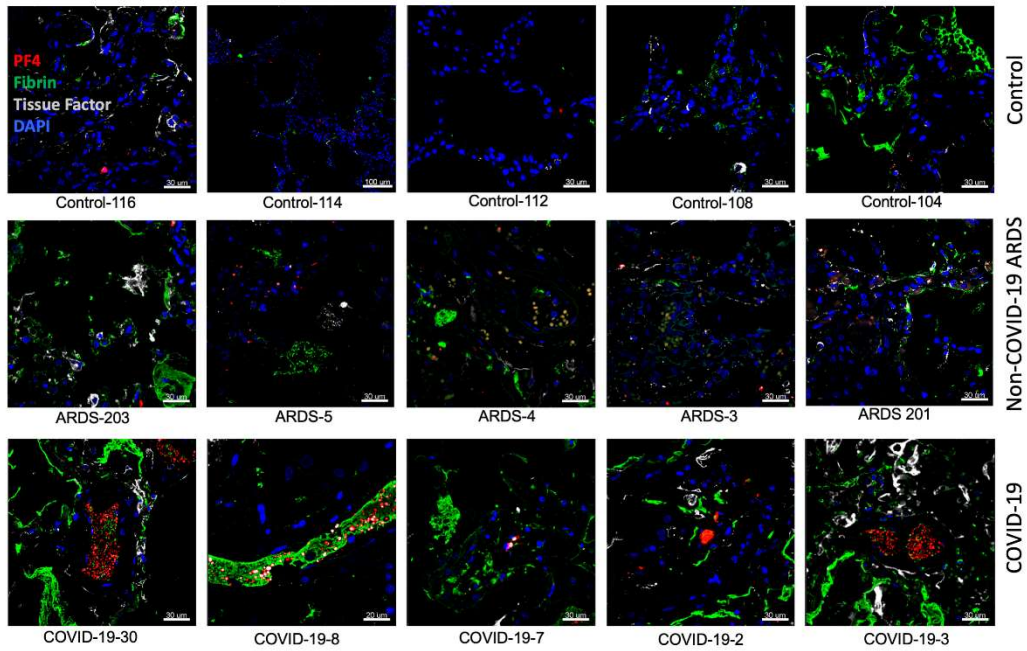

**Supplemental Figure S2:** Immunofluorescent images of lung sections stained with PF4 (red), Fibrin (green) and TF (white) antibodies from five non-ARDS controls, non-COVID-19 ARDS, and COVID-19 cases.

Supplemental Figure S3

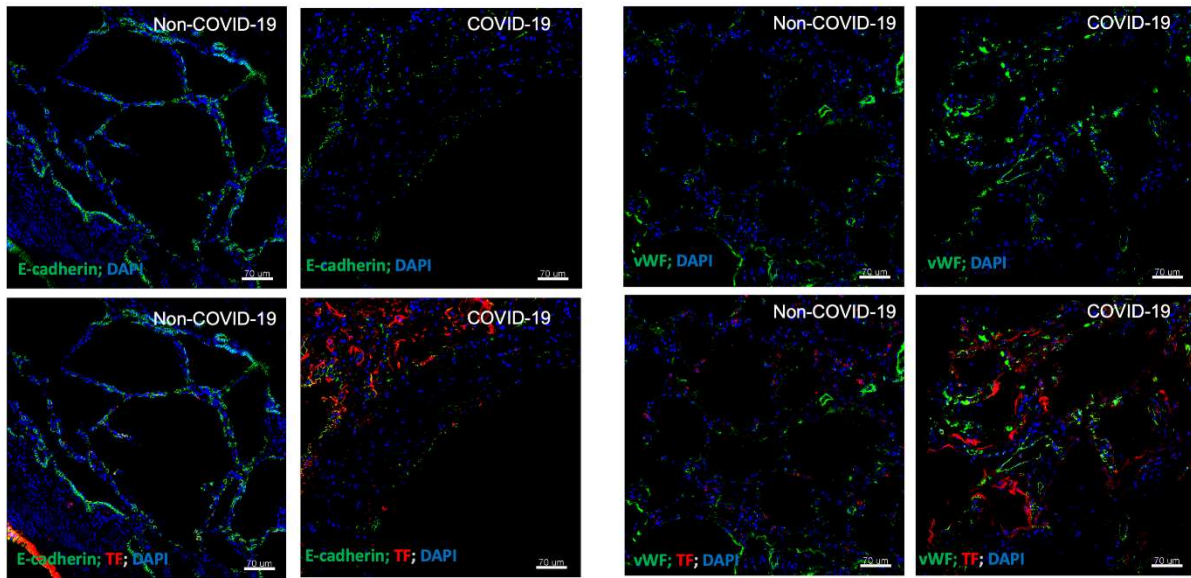

**Supplemental Figure S3:** Immunofluorescent images of lungs stained with epithelial cells marker, E-cadherin (green) with TF (red) in control and COVID-19-ARDS (left 4 panels). Right 4 panels show endothelial cells stained with vWf (green) with TF (red) in non-ARDS controls, non-COVID-19 lungs. Nuclei were stained with dapi (blue).

Supplemental Figure S4

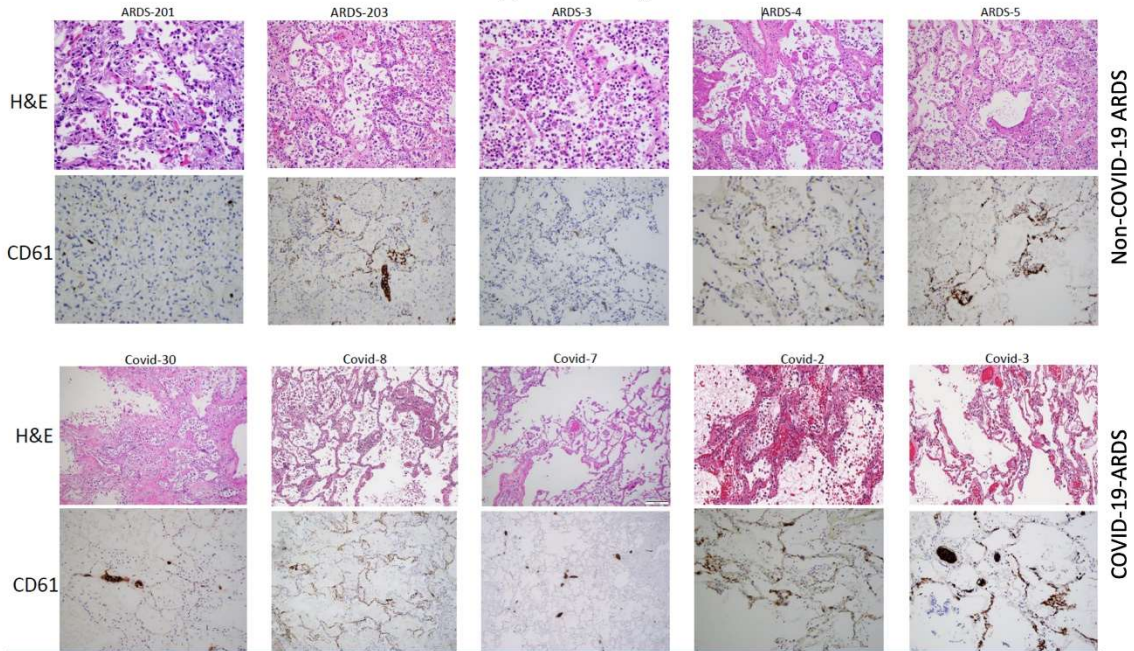

**Supplemental Figure S4:** Lung sections of five non-COVID-19 ARDS, and COVID-19-ARDS cases, stained with H&E (upper panels) and immunohistochemistry with CD61 antibody (bottom panels).

**Supplemental Table 1**

| Antibody                            | Vendor                  | Catalog#    | Host   |
|-------------------------------------|-------------------------|-------------|--------|
| Anti-Human Tissue Factor            | R&D Systems, Bio-Techne | AF2339      | Goat   |
| Anti-Human Fibrin                   | Sigma Aldrich           | MABS2155    | Mouse  |
| Anti-Human Platelet Factor 4        | Cell Sciences           | PA1142      | Rabbit |
| Anti-SARS-CoV2 Nucleocapsid Protein | Novus Biologicals       | NB100-56576 | Rabbit |

|                                                              |                                 |             |                                                                   |
|--------------------------------------------------------------|---------------------------------|-------------|-------------------------------------------------------------------|
| Anti-Human E-Cadherin                                        | Abcam                           | Ab76055     | Mouse                                                             |
| Polyclonal anti-vWf                                          | Agilent Technologies            | A008229     | Rabbit                                                            |
| Alexa Flour 488 F(ab') <sub>2</sub><br>Anti Goat IgG (H+L)   | Jackson Immuno Research         | 705-546-147 | Donkey                                                            |
| Alexa Flour 594 F(ab') <sub>2</sub><br>Anti Mouse IgG (H+L)  | Jackson Immuno Research         | 715-586-150 | Donkey                                                            |
| Alexa Flour 647 F(ab') <sub>2</sub><br>Anti Rabbit IgG (H+L) | Jackson Immuno Research         | 711-607-003 | Donkey                                                            |
| Alexa Flour 488 F(ab') <sub>2</sub><br>Anti Mouse IgG (H+L)  | Jackson Immuno Research         | 715-546-150 | Donkey                                                            |
| Alexa Flour 594 F(ab') <sub>2</sub><br>Anti Rabbit IgG (H+L) | Jackson Immuno Research         | 711-586-152 | Donkey                                                            |
| <b>In Situ Hybridization Probe</b>                           |                                 |             |                                                                   |
| 2.5 LS Probe - V-nCoV2019-S                                  | Advanced Cell Diagnostics (ACD) | 848568      | Design: V-nCoV2019-S, 20zz targeting 21631-23303 of NC_045512.2   |
| 2.5 LS Probe - Hs-F3-C2                                      | Advanced Cell Diagnostics (ACD) | 407618-C2   | coagulation factor III, 20zz targeting 275-1229 of NM_001178096.1 |
